# Supplementary material for: The impact of SARS-CoV-2 vaccination on Alpha & Delta variant transmission
Source: bioRxiv or medRxiv preprint supplement (doi:10.1101/2021.09.28.21264260), 2021-10-15
Supplement: Supplementary file [file media-1.pdf]

# The impact of SARS-CoV-2 vaccination on Alpha & Delta variant transmission: Supplementary material

## Supplementary methods

### Contact definition

Contacts were defined as follows in line with national guidelines:<sup>1</sup> a person who has been close to someone who has tested PCR-positive for COVID-19 anytime from 2 days before the person was symptomatic up to 10 days from onset of symptoms. The nature of the contact could include:

- Living in the same household OR
- Face to face contact (within 1 metre for any length of time) or skin to skin contact or someone the case coughed on OR
- Within 1 metre for 1 minute or longer OR
- Within 1-2 metres for more than 15 minutes OR
- Sexual contacts OR
- Travel in the same vehicle or a plane

Contacts named by more than one index patient in a 10-day period were excluded given ambiguity about the infection source if the contact tested positive.

### Vaccination status

Index cases and contacts were included where their vaccination status, obtained from National Immunisation Management Service, was known. Matching was performed using NHS numbers, which are unique to each person in the UK. As all vaccination records included an NHS number, absence of a matched record was classified as unvaccinated, accepting a small amount of misclassification from individuals vaccinated in other countries or in trials. Only individuals vaccinated with Pfizer-BioNTech BNT162b2 and AstraZeneca ChAdOx1 were included, as numbers receiving other vaccines were too few to analyse.

### Classification of variants

Contacts of index cases tested between 01-January-2021 and 31-July-2021 were included as follows. Index cases with S-gene target failure (SGTF), used as a proxy for the Alpha (B.1.1.7) variant, were included up to 06-June-2021. During this period 5-95% of sequenced infections were due to Alpha.<sup>2</sup> However following 06-June-2021, the Alpha variant accounted for  $\leq 2\%$  of cases/week<sup>2</sup> (Figure S1), such that there was ambiguity about whether S gene target failure (SGTF) was due to Alpha or stochastic failure to amplify the S gene target at low viral loads with other lineages (predominantly Delta), which occurred in 1% of samples when Delta dominated at the end of July-2021. From the week beginning 10-May-

2021 national spread of Delta meant that >98% of sequenced cases were either due to the Alpha or Delta variants,<sup>2</sup> such that we used detection of S gene on or after 10-May-2021 as a proxy for the Delta variant. Index cases without SGTF prior to 10-May-2021 were excluded, as it was not possible to distinguish which cases had the Delta variant.

#### Statistical methods details

We used natural cubic splines to account for non-linear effects of continuous variables following truncation at the 2.5<sup>th</sup> and 97.5<sup>th</sup> centiles, allowing up to 5 default-placed knots (9 for calendar time to allow greater flexibility) and choosing the best fitting models using the Bayesian information criterion (BIC). Time since second vaccination for cases and contacts was log2 transformed (on the basis of model fit), truncating time separately for each vaccine. Interactions between all model main effects were included with this improved model fit based on the BIC.

All analyses were performed in R, version 4.0.

#### Supplementary results

A total of 12,657 contacts were excluded with incomplete data (8.3%): 11 missing index case Ct values, 7,721 missing a contact event type, 163 index case sex, 29 contact age, 5 contact sex, 173 contact's local area, and 4,555 with tests performed prior to availability of vaccination data for their local area (predominantly in January 2021).

## Supplementary Tables

| Model factors  | Description                      | Notes                                                                                                                                 |                                                                          |
|----------------|----------------------------------|---------------------------------------------------------------------------------------------------------------------------------------|--------------------------------------------------------------------------|
| Main exposures | Index patient vaccination status | Pre-specified interaction with index patient SARS-CoV-2 variant included                                                              |                                                                          |
|                | Index patient SARS-CoV-2 variant | Alpha; Delta                                                                                                                          |                                                                          |
| Covariates     | Contact event type               |                                                                                                                                       |                                                                          |
|                | Index patient factors            | Age                                                                                                                                   |                                                                          |
|                |                                  | Sex                                                                                                                                   |                                                                          |
|                |                                  | Symptom status                                                                                                                        |                                                                          |
|                | Contact factors                  | Age                                                                                                                                   |                                                                          |
|                |                                  | Sex                                                                                                                                   |                                                                          |
|                |                                  | Vaccination status                                                                                                                    | Pre-specified interaction with index patient SARS-CoV-2 variant included |
|                | Local area deprivation           | Index of multiple deprivation (IMD) score for the local area (lower tier local authority, LTLA) containing the contact's home address |                                                                          |
|                | Local area SARS-CoV-2 Incidence  | Rolling 7-day average SARS-CoV-2 incidence in the contact's LTLA on the day on the contact's PCR test                                 |                                                                          |
|                | Local area second vaccine uptake | The percentage of those eligible having received two vaccines in the contact's LTLA on the day of the contact's PCR test              |                                                                          |
| Calendar time  |                                  |                                                                                                                                       |                                                                          |

**Table S1. Model covariates.**

| Index case vaccination status | n      | Age, median | Age, IQR | Female, n | Female, % | Symptomatic, n | Symptomatic, % | Alpha variant, n | Alpha variant, % |
|-------------------------------|--------|-------------|----------|-----------|-----------|----------------|----------------|------------------|------------------|
| Unvaccinated                  | 41,728 | 41          | 29 - 52  | 22,309    | 53.5%     | 38,970         | 93.4%          | 38,051           | 91.2%            |
| Partial ChAdOx1               | 9,723  | 44          | 39 - 51  | 5,212     | 53.6%     | 9,022          | 92.8%          | 3,468            | 35.7%            |
| Partial BNT162b2              | 22,886 | 28          | 22 - 36  | 11,324    | 49.5%     | 21,450         | 93.7%          | 3,641            | 15.9%            |
| Fully ChAdOx1                 | 16,680 | 48          | 36 - 56  | 8,562     | 51.3%     | 15,679         | 94.0%          | 75               | 0.4%             |
| Fully BNT162b2                | 4,699  | 46          | 32 - 59  | 2,949     | 62.8%     | 4,159          | 88.5%          | 145              | 3.1%             |

**Table S2. Index case demographics, symptom status, and infecting variant by index case vaccine status.**

| Contact vaccination status | n      | Age, median | Age, IQR | Female, n | Female, % | Alpha variant, n | Alpha variant, % |
|----------------------------|--------|-------------|----------|-----------|-----------|------------------|------------------|
| Unvaccinated               | 70,370 | 28          | 16 - 47  | 36,436    | 51.8      | 52,009           | 73.9             |
| Partial ChAdOx1            | 10,325 | 47          | 41 - 54  | 5,814     | 56.3      | 3,406            | 33               |
| Partial BNT162b2           | 18,017 | 30          | 24 - 37  | 10,372    | 57.6      | 3,492            | 19.4             |
| Fully ChAdOx1              | 27,343 | 53          | 45 - 59  | 15,758    | 57.6      | 138              | 0.5              |
| Fully BNT162b2             | 13,109 | 52          | 37 - 60  | 8,897     | 67.9      | 310              | 2.4              |

**Table S3. Contact demographics, and associated index case variant by contact vaccine status.**

| Characteristic                                                               | n             | Infected | % infected | aOR                | 95% CI     | p-value |
|------------------------------------------------------------------------------|---------------|----------|------------|--------------------|------------|---------|
| Variant                                                                      |               |          |            |                    |            |         |
| Alpha                                                                        | 59,355        | 30,310   | 51         | —                  | —          |         |
| Delta                                                                        | 79,809        | 21,488   | 27         | 1.30               | 1.10, 1.54 | 0.002   |
| Index case vaccination status                                                |               |          |            |                    |            |         |
| Unvaccinated                                                                 | 55,977        | 27,666   | 49         | —                  | —          |         |
| Partial ChAdOx1                                                              | 14,398        | 5,256    | 37         | 0.82               | 0.76, 0.88 | <0.001  |
| Partial BNT162b2                                                             | 36,085        | 9,623    | 27         | 0.74               | 0.70, 0.80 | <0.001  |
| Full ChAdOx1                                                                 | 25,422        | 7,559    | 30         | 0.37               | 0.22, 0.63 | <0.001  |
| Full BNT162b2                                                                | 7,282         | 1,694    | 23         | 0.18               | 0.12, 0.29 | <0.001  |
| Index case vaccination status * Variant                                      |               |          |            |                    |            |         |
| Partial ChAdOx1 * Delta                                                      | 9,950         | 3,229    | 32         | 1.20               | 1.07, 1.34 | 0.002   |
| Partial BNT162b2 * Delta                                                     | 31,339        | 7,530    | 24         | 1.17               | 1.06, 1.30 | 0.003   |
| Full ChAdOx1 * Delta                                                         | 25,293        | 7,539    | 30         | 1.71               | 1.01, 2.90 | 0.045   |
| Full BNT162b2 * Delta                                                        | 7,052         | 1,663    | 24         | 1.93               | 1.25, 2.99 | 0.003   |
| Index case, per doubling of weeks since two weeks after second ChAdOx1 dose  |               |          |            | 1.13               | 1.09, 1.17 | <0.001  |
| Index case, per doubling of weeks since two weeks after second BNT162b2 dose |               |          | 37         | 1.20               | 1.10, 1.31 | <0.001  |
| Index case age                                                               | See Figure 2A |          |            |                    |            |         |
| Index case sex                                                               |               |          |            |                    |            |         |
| F                                                                            | 73,883        | 26,938   | 36         | See Figure 2C      |            |         |
| M                                                                            | 65,281        | 24,860   | 38         |                    |            |         |
| Index case symptoms                                                          |               |          |            |                    |            |         |
| Symptomatic                                                                  | 129,341       | 49,757   | 38         | —                  | —          |         |
| Asymptomatic                                                                 | 9,823         | 2,041    | 21         | 0.28               | 0.26, 0.30 | <0.001  |
| Variant * Index case symptoms                                                |               |          |            |                    |            |         |
| Delta * Asymptomatic                                                         | 4,886         | 790      | 16         | 1.64               | 1.47, 1.83 | <0.001  |
| Event type                                                                   |               |          |            |                    |            |         |
| Household or accommodation                                                   | 97,387        | 45,274   | 46         | See Figures 2A, 2B |            |         |
| Household Visitor                                                            | 14,066        | 2,594    | 18         |                    |            |         |
| Events / Activities                                                          | 14,270        | 2,064    | 14         |                    |            |         |
| Work or Education                                                            | 13,441        | 1,866    | 14         |                    |            |         |
| Contact vaccination status                                                   |               |          |            |                    |            |         |
| Unvaccinated                                                                 | 70,370        | 34,137   | 49         | —                  | —          |         |
| Partial ChAdOx1                                                              | 10,325        | 3,401    | 33         | 0.89               | 0.82, 0.97 | 0.010   |
| Partial BNT162b2                                                             | 18,017        | 5,809    | 32         | 0.69               | 0.64, 0.75 | <0.001  |
| Full ChAdOx1                                                                 | 27,343        | 6,163    | 23         | 0.29               | 0.17, 0.49 | <0.001  |
| Full BNT162b2                                                                | 13,109        | 2,288    | 17         | 0.06               | 0.04, 0.10 | <0.001  |
| Contact vaccination status * Variant                                         |               |          |            |                    |            |         |
| Partial ChAdOx1 * Delta                                                      | 6,919         | 1,827    | 26         | 0.60               | 0.54, 0.67 | <0.001  |
| Partial BNT162b2 * Delta                                                     | 14,525        | 4,235    | 29         | 0.83               | 0.76, 0.92 | <0.001  |
| Full ChAdOx1 * Delta                                                         | 27,205        | 6,144    | 23         | 0.97               | 0.57, 1.65 | 0.91    |
| Full BNT162b2 * Delta                                                        | 12,799        | 2,260    | 18         | 1.64               | 1.07, 2.51 | 0.024   |

| Characteristic                                                                 | n             | Infected | % infected | aOR                   | 95% CI     | p-value |
|--------------------------------------------------------------------------------|---------------|----------|------------|-----------------------|------------|---------|
| Contact, per doubling of weeks since two weeks after second ChAdOx1 dose       |               |          |            | 1.16                  | 1.11, 1.21 | <0.001  |
| Contact, per doubling of weeks since two weeks after second BNT162b2 dose      |               |          |            | 1.37                  | 1.27, 1.48 | <0.001  |
| Contact age                                                                    | See Figure 2B |          |            |                       |            |         |
| Contact sex                                                                    |               |          |            |                       |            |         |
| F                                                                              | 77,277        | 27,790   | 36         | See Figures 2C and S2 |            |         |
| M                                                                              | 61,887        | 24,008   | 39         |                       |            |         |
| Index of multiple deprivation, per 1000 change, higher indicates more deprived |               |          |            | 1.02                  | 1.02, 1.02 | <0.001  |
| Local SARS-CoV-2 incidence                                                     | See Figure S3 |          |            |                       |            |         |
| Study day                                                                      | See Figure S4 |          |            |                       |            |         |
| Event type * Contact sex                                                       | See Figure S2 |          |            |                       |            |         |
| Index case sex * Contact age                                                   | See Figure 2C |          |            |                       |            |         |
| Index case sex * Contact sex                                                   | See Figure 2C |          |            |                       |            |         |
| Event type * Index case age                                                    | See Figure 2A |          |            |                       |            |         |
| Event type * Contact age                                                       | See Figure 2B |          |            |                       |            |         |
| Index case age * Contact age                                                   | See Figure 2D |          |            |                       |            |         |

**Table S4. Multivariable logistic regression analysis of associations of PCR-positive results in contacts.** aOR, adjusted odds ratio; CI, confidence interval; \* indicates an interaction term. Non-linear relationships and associated interactions are shown in Figures 2 and S2-S4 as indicated.

## Supplementary Figures

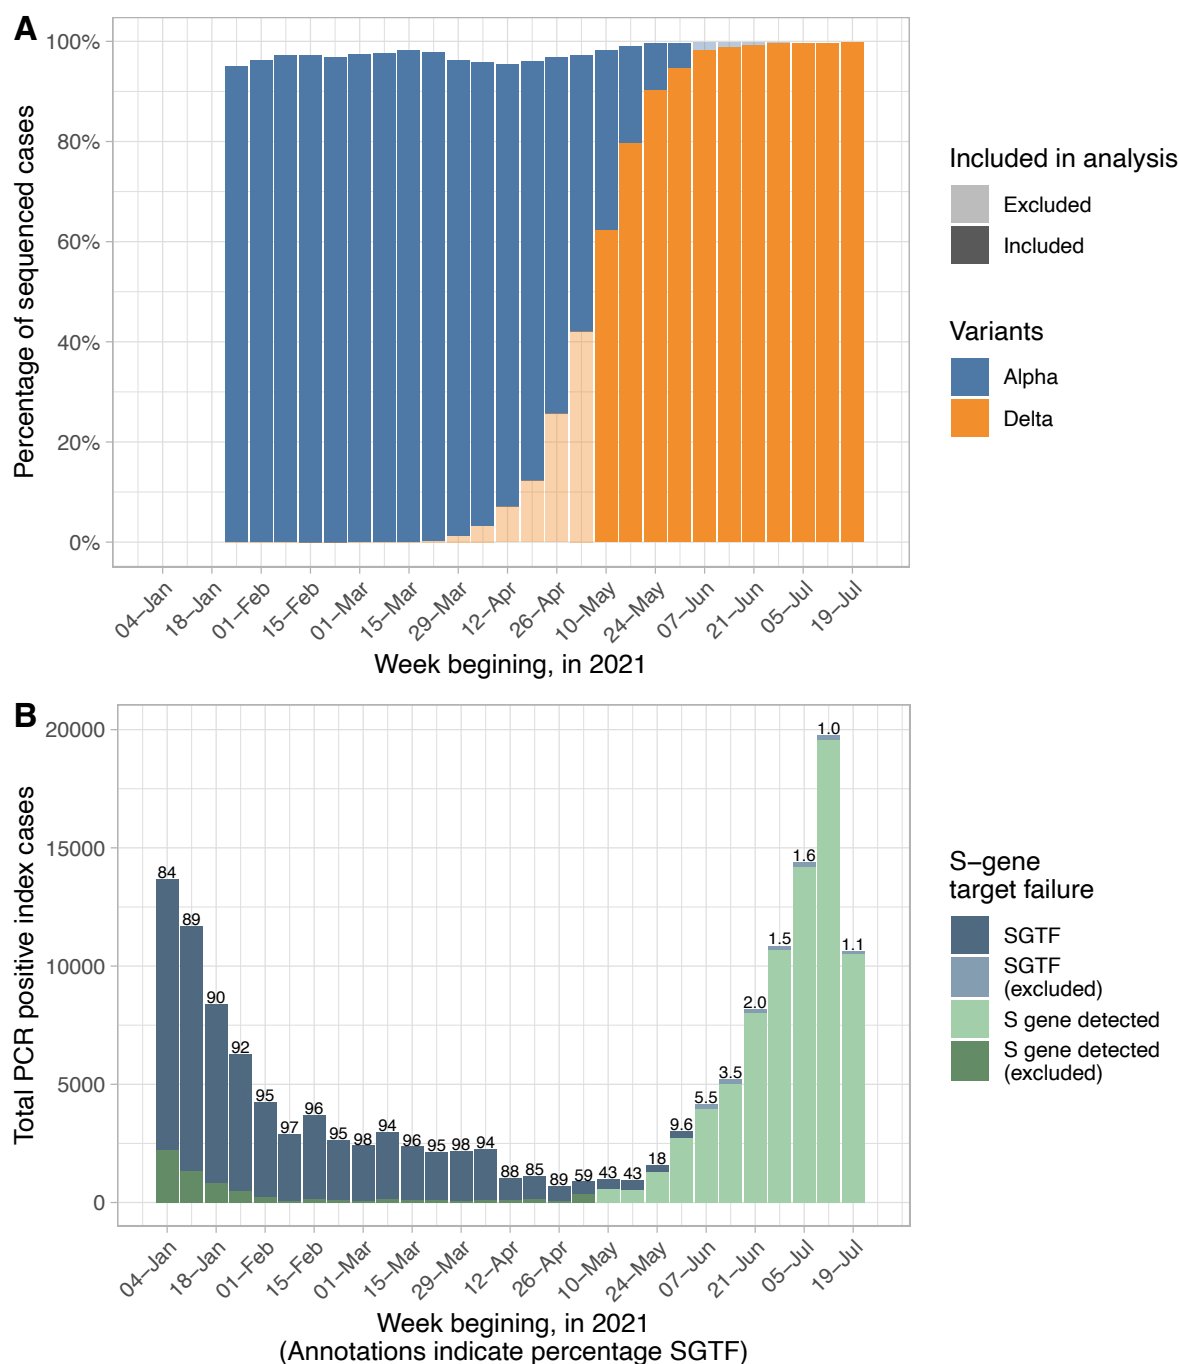

**Figure S1. National incidence of Alpha and Delta variants as determined by whole genome sequencing (panel A) and index case incidence according to S-gene target failure (SGTF, panel B).** In panel A, weeks for which index cases with presumed Alpha and Delta infections (see Methods) were included in the analysis are shown in the denser shading (sequencing not used to determine variant as not available for all index cases). Based on results of national sequencing data available at

<https://www.gov.uk/government/publications/investigation-of-novel-sars-cov-2-variant-variant-of-concern-20201201>. SGTF was seen in 1% of infections in the final two weeks of the study when Delta accounted for nearly all infections. Hence by only classifying index cases Alpha variant on the basis of SGTF in weeks where Alpha prevalence by sequencing exceeded  $\geq 5\%$  we ensured misclassification was minimised. In panel B the percentage of index cases with SGTF is provided above each bar.



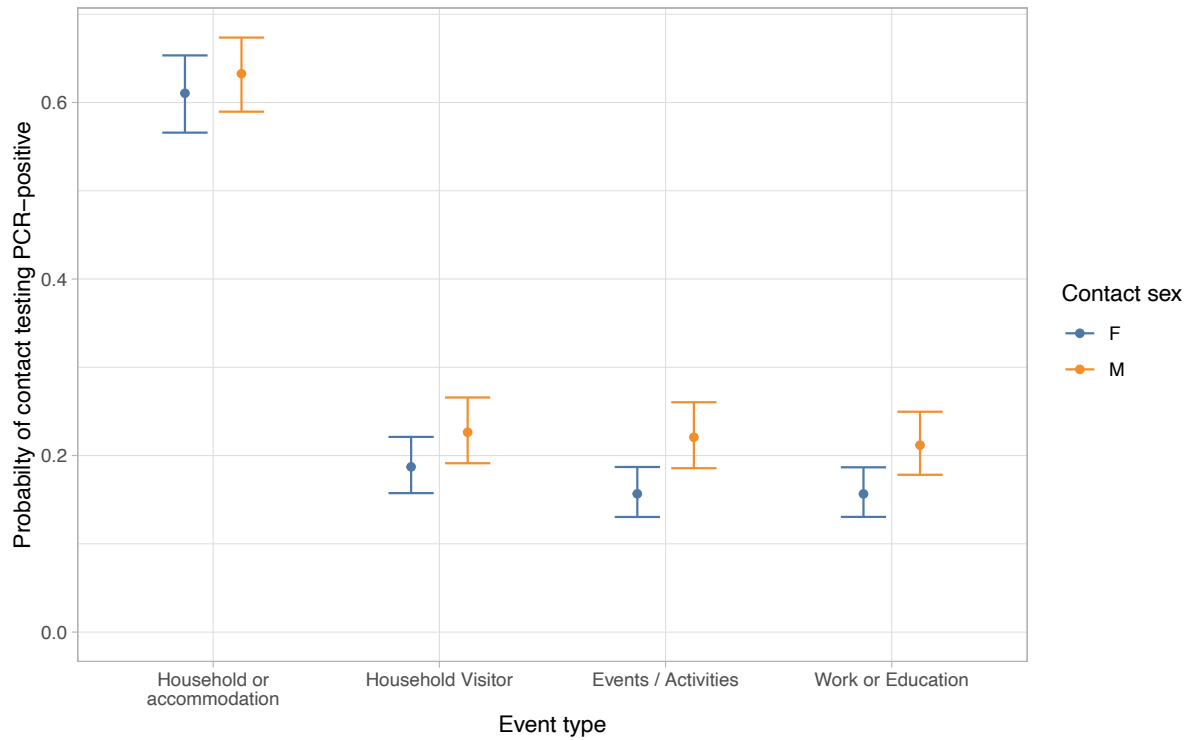

**Figure S2. Relationship between contact sex and contact event type and probability of a positive PCR test in a contact.** All other continuous covariates are set to median values and categorical covariates to reference categories, including variant, which is set to Alpha, and index symptom status, set to symptomatic. The error bars indicate 95% confidence intervals.

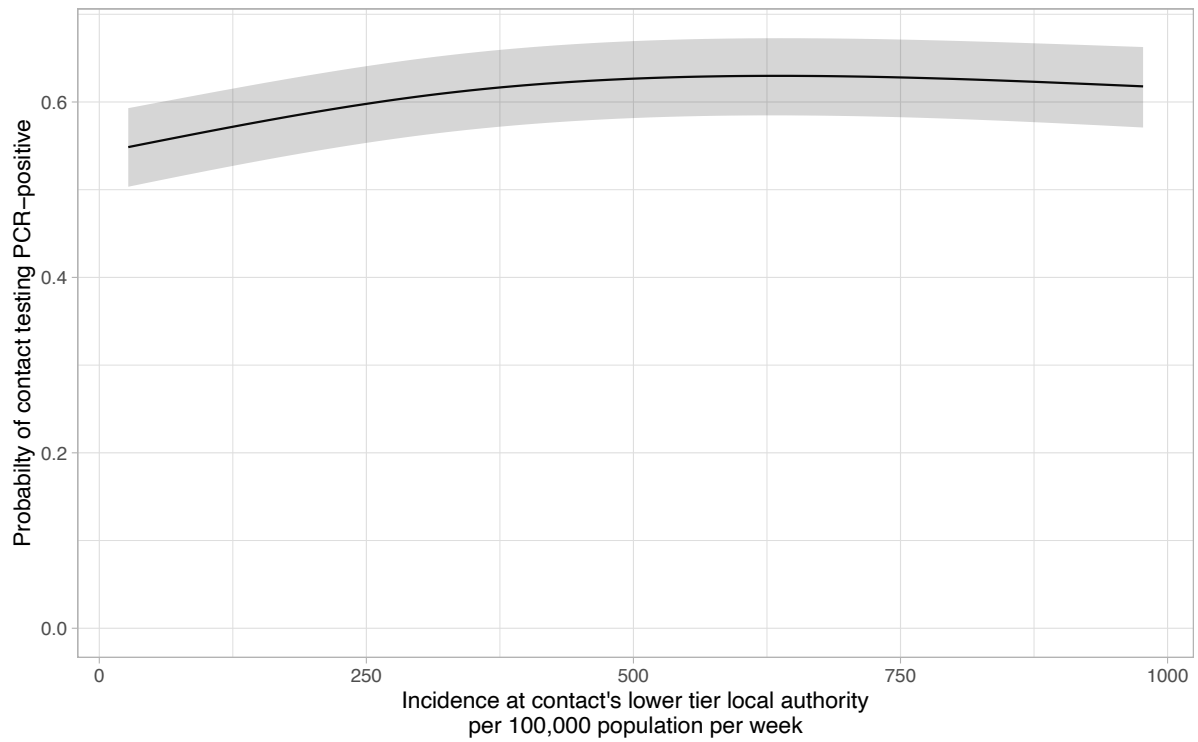

**Figure S3. Relationship between local SARS-CoV-2 incidence and probability of a positive PCR test in a contact.** All other continuous covariates are set to median values and categorical covariates to reference categories. The shaded area indicates the 95% confidence interval.

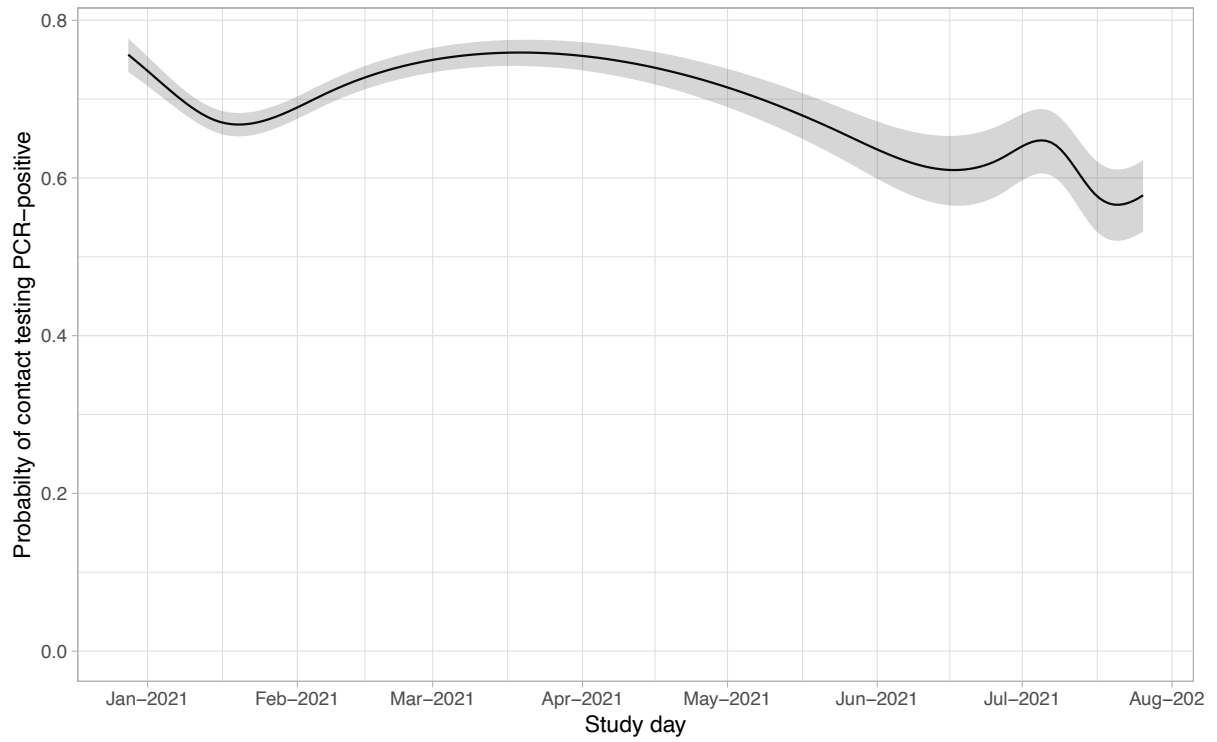

**Figure S4. Relationship between study day and probability of a positive PCR test in a contact.** All other continuous covariates are set to median values and categorical covariates to reference categories. The shaded area indicates the 95% confidence interval.

## References

1 Public Health England. Guidance for contacts of people with confirmed coronavirus (COVID-19) infection who do not live with the person.

<https://www.gov.uk/government/publications/guidance-for-contacts-of-people-with-possible-or-confirmed-coronavirus-covid-19-infection-who-do-not-live-with-the-person/guidance-for-contacts-of-people-with-possible-or-confirmed-coronavirus-covid-19-infection-who-do-not-live-with-the-person> (accessed Jan 20, 2021).

2 Public Health England. SARS-CoV-2 variants of concern and variants under investigation in England: Technical briefing 21. 2021; published online Aug 20.

[https://assets.publishing.service.gov.uk/government/uploads/system/uploads/attachment\\_data/file/1012644/Technical\\_Briefing\\_21.pdf](https://assets.publishing.service.gov.uk/government/uploads/system/uploads/attachment_data/file/1012644/Technical_Briefing_21.pdf) (accessed Sept 2, 2021).
